# Supplementary material
Source: PubMed Central journal article supplement (PMC8035132)
Supplement: NIHMS1646082-supplement-3.pdf [file NIHMS1646082-supplement-3.pdf]

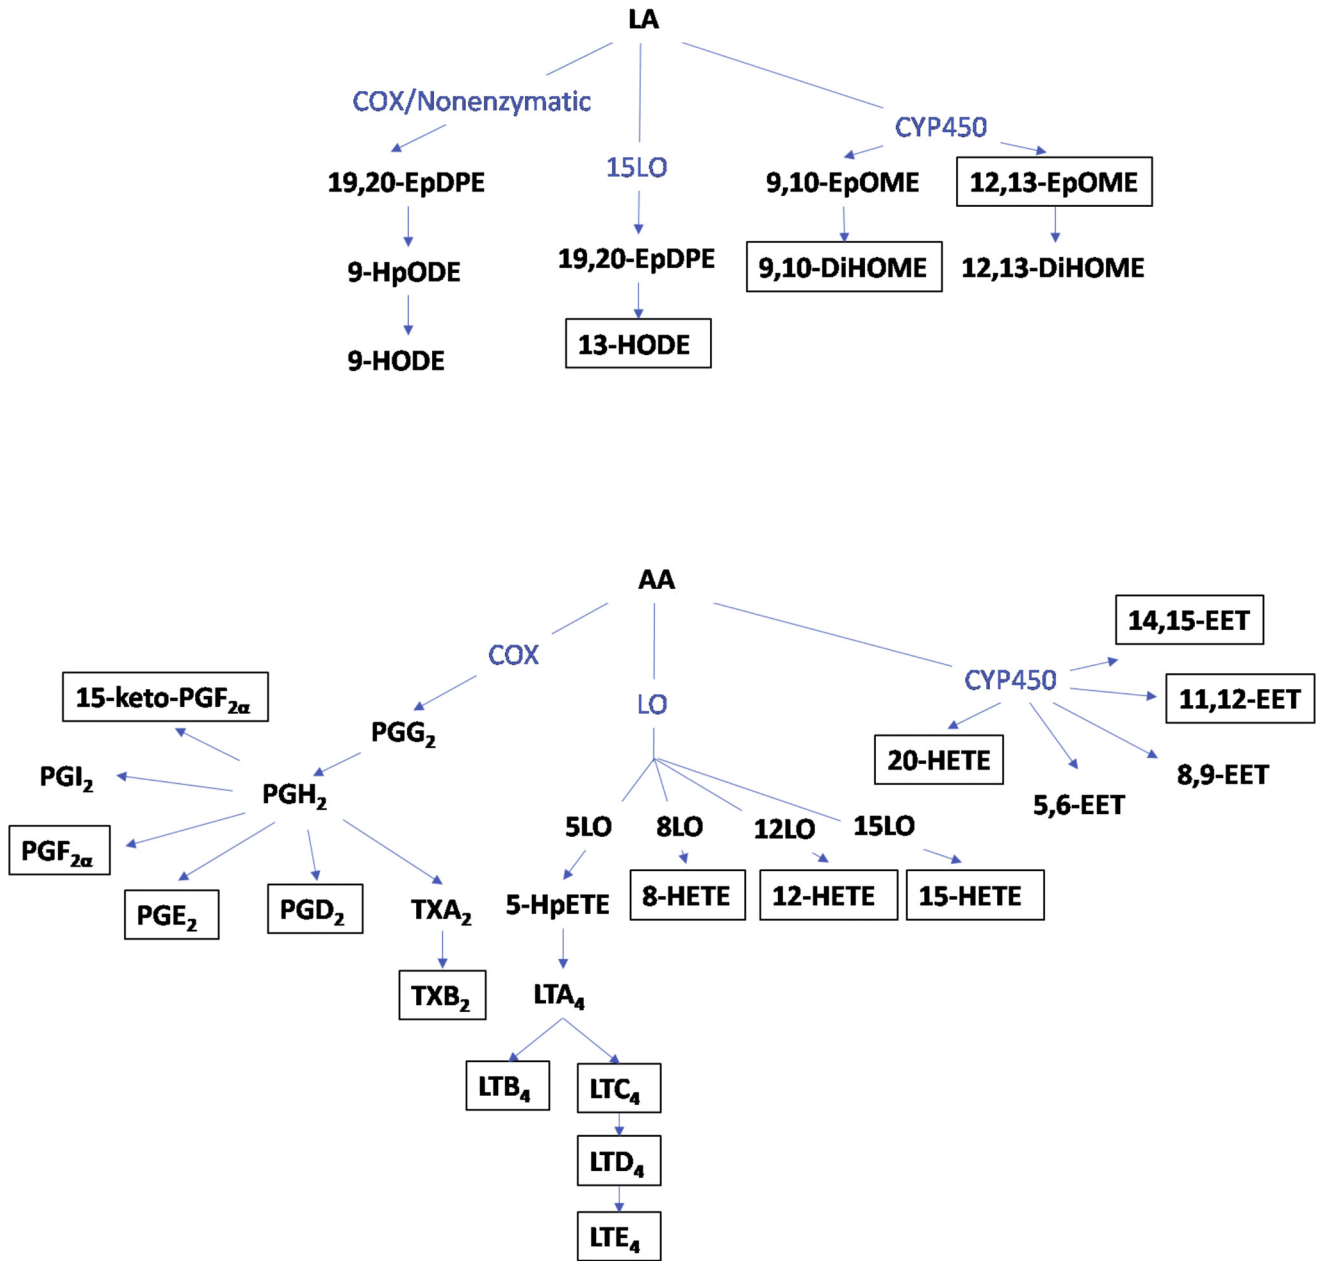

**FIG E1.** LA and AA metabolism. Lipid mediators evaluated by (ultraperformance LC)-MS are highlighted in boxes.

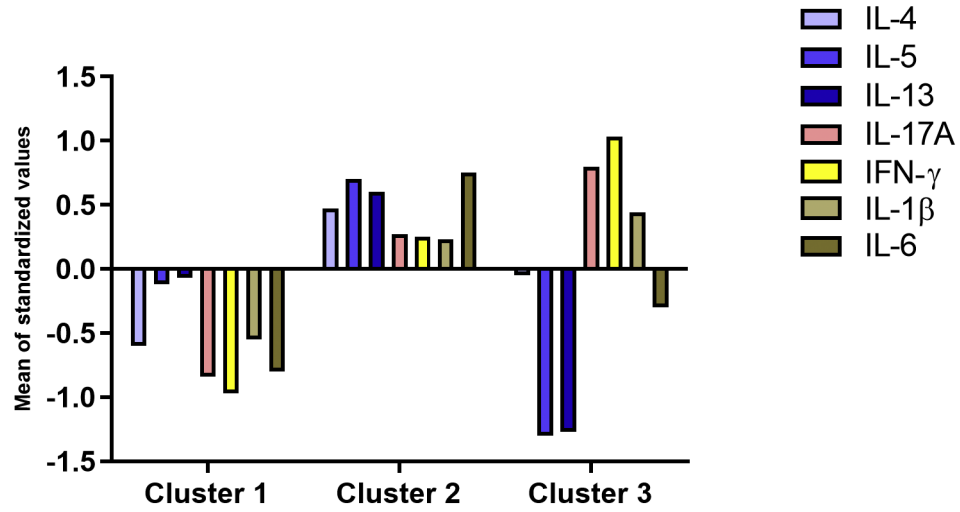

**FIG E2.** Cytokine signature in AERD inflammatory clusters. The mean standardized levels of representative cytokines representing type 1 (IFN- $\gamma$ ), type 2 (IL-4, IL-5, IL-13), type 3 (IL-17A), and innate immune (IL-1 $\beta$ , IL-6) signatures are shown for each disease cluster.

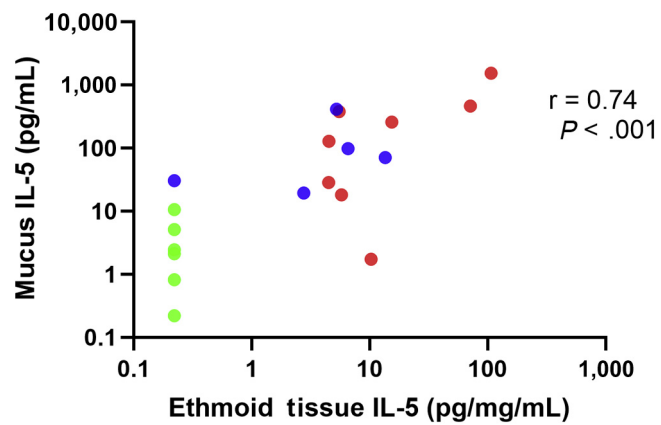

**FIG E3.** Correlation of IL-5 levels in mucus and ethmoid tissue. Green, control (n = 7); Blue, CRSwNP (n = 5); Red, AERD (n = 8). *R* value calculated via Spearman correlation.

**TABLE E1.** Mucus cytokine levels in patients with AERD, patients with CRSwNP, and non-CRS control patients

| Cytokine      | Control (n = 64)  | CRSwNP (n = 109)    | AERD (n = 30)        | <i>P</i> value  |
|---------------|-------------------|---------------------|----------------------|-----------------|
| IL-1 $\beta$  | 84.8 (30.1-300.7) | 128.1 (23.1-521.1)  | 108.0 (17.7-1097.2)  | .67             |
| IL-4          | 0.28 (0.28-1.04)  | 0.28 (0.28-1.92)*   | 1.85 (0.28-3.70)*    | <b>&lt;.001</b> |
| IL-5          | 0.92 (0.22-3.56)  | 30.2 (9.6-82.1)*    | 168.0 (46.3-374.1)*† | <b>&lt;.001</b> |
| IL-6          | 73.4 (25.9-181.4) | 184.5 (58.9-521.5)* | 636 (206-2346)*†     | <b>&lt;.001</b> |
| IL-13         | 10.4 (3.7-28.6)   | 19.5 (7.7-46.0)     | 95.7 (37.7-222.7)*†  | <b>&lt;.001</b> |
| IL-17A        | 0.06 (0.06-2.25)  | 0.99 (0.06-5.11)    | 3.75 (1.39-6.05)*    | <b>.004</b>     |
| IFN- $\gamma$ | 0.39 (0.36-2.90)  | 0.61 (0.36-3.50)    | 4.02 (1.46-7.79)*†   | <b>.002</b>     |

Median cytokine levels of control subjects and patients with CRSwNP and AERD are shown for 7 cytokines. All cytokine values are presented as pg/mL. Significant differences between groups were identified by the Kruskal-Wallis test followed by Dunn's test for multiple comparisons. Data are presented as medians with interquartile range. Boldface text indicates *P* value of less than .05.

\**P* < .05 compared with control.

†*P* < .05 compared with CRSwNP.

**TABLE E2.** SNOT-22 score correlation with lipid mediator levels in subjects with AERD

| Mediator                 | Spearman <i>r</i> | <i>P</i> value |
|--------------------------|-------------------|----------------|
| 12,13-EpOME              | -0.003            | .99            |
| 9,10-DiHOME              | 0.201             | .35            |
| 12,13-DiHOME             | 0.159             | .46            |
| 9,10-EpOME               | 0.130             | .55            |
| 13-HODE                  | 0.054             | .80            |
| 8-HETE                   | 0.018             | .93            |
| 12-HETE                  | -0.014            | .95            |
| 15-HETE                  | 0.000             | .99            |
| 11,12-EET                | -0.130            | .54            |
| 14,15-EET                | -0.053            | .81            |
| 20-HETE                  | -0.060            | .78            |
| TxB <sub>2</sub>         | 0.087             | .69            |
| PGD <sub>2</sub>         | 0.017             | .94            |
| 15-keto-PGE <sub>2</sub> | -0.139            | .52            |
| PGE <sub>2</sub>         | -0.070            | .75            |
| PGF <sub>2a</sub>        | 0.023             | .92            |
| 9a,11b-PGF <sub>2a</sub> | -0.181            | .40            |
| LTB <sub>4</sub>         | 0.330             | .11            |
| LTC <sub>4</sub>         | 0.018             | .93            |
| LTD <sub>4</sub>         | 0.174             | .42            |
| LTE <sub>4</sub>         | 0.444             | <b>.03</b>     |

The correlation of lipid mediator levels with total SNOT-22 score was evaluated using Spearman correlation. Boldface indicates a *P* value of less than .05.
